# Supplementary material
Source: publisher figshare collection journal article supplement (https://acs.figshare.com/ndownloader/files/4440553)
Supplement: Supplementary file 1 [file 4440553]

data_1819

_audit_creation_method            'SHELXL-97 & ZCIF'
_chemical_name_systematic
;
piperidine-1-oxyl-4-methylene acetic acid methyl ester
;
_chemical_name_common             nitroxide
_chemical_formula_moiety          'C12 H20 N O3'
_chemical_formula_sum             'C12 H20 N O3'
_chemical_formula_weight          226.29

loop_
 _atom_type_symbol
 _atom_type_description
 _atom_type_scat_dispersion_real
 _atom_type_scat_dispersion_imag
 _atom_type_scat_source
 'C'  'C'   0.0033   0.0016
 'International Tables Vol C Tables 4.2.6.8 and 6.1.1.4'
 'H'  'H'   0.0000   0.0000
 'International Tables Vol C Tables 4.2.6.8 and 6.1.1.4'
 'N'  'N'   0.0061   0.0033
 'International Tables Vol C Tables 4.2.6.8 and 6.1.1.4'
 'O'  'O'   0.0106   0.0060
 'International Tables Vol C Tables 4.2.6.8 and 6.1.1.4'

_symmetry_cell_setting            Monoclinic
_symmetry_space_group_name_H-M    P21/c

loop_
 _symmetry_equiv_pos_as_xyz
 'x, y, z'
 '-x, y+1/2, -z+1/2'
 '-x, -y, -z'
 'x, -y-1/2, z-1/2'

_cell_length_a                    7.7657(7)
_cell_length_b                    15.5387(14)
_cell_length_c                    11.2639(10)
_cell_angle_alpha                 90.00
_cell_angle_beta                  109.5925(10)
_cell_angle_gamma                 90.00
_cell_volume                      1280.5(2)
_cell_formula_units_Z             4
_cell_measurement_temperature     250(2)
_cell_measurement_reflns_used     5154
_cell_measurement_theta_min       2.3
_cell_measurement_theta_max       25.5

_exptl_crystal_description        bulk
_exptl_crystal_colour             orange
_exptl_crystal_size_max           0.53
_exptl_crystal_size_mid           0.50
_exptl_crystal_size_min           0.40
_exptl_crystal_density_meas       ?
_exptl_crystal_density_diffrn     1.174
_exptl_crystal_density_method     ?
_exptl_crystal_F_000              492
_exptl_absorpt_coefficient_mu     0.084
_exptl_absorpt_correction_type    multi-scan
_exptl_absorpt_correction_T_min   0.914
_exptl_absorpt_correction_T_max   0.967
_exptl_absorpt_process_details    'SADABS (Sheldrick, 1996)'

_diffrn_ambient_temperature       250(2)
_diffrn_radiation_wavelength      0.71073
_diffrn_radiation_type            MoK\a
_diffrn_radiation_source          'fine-focus sealed tube'
_diffrn_radiation_monochromator   graphite
_diffrn_measurement_device_type   'three-circle diffractometer'
_diffrn_measurement_method        '\w scans'
_diffrn_detector_area_resol_mean  11.198
_diffrn_standards_decay_%         0
_diffrn_reflns_number             9232
_diffrn_reflns_av_R_equivalents   0.0220
_diffrn_reflns_av_sigmaI/netI     0.0216
_diffrn_reflns_limit_h_min        -9
_diffrn_reflns_limit_h_max        9
_diffrn_reflns_limit_k_min        -18
_diffrn_reflns_limit_k_max        18
_diffrn_reflns_limit_l_min        -13
_diffrn_reflns_limit_l_max        13
_diffrn_reflns_theta_min          2.32
_diffrn_reflns_theta_max          25.00
_reflns_number_total              2268
_reflns_number_gt                 1909
_reflns_threshold_expression      >2sigma(I)

_computing_data_collection        'Apex2 (Bruker, 2005)'
_computing_cell_refinement        Apex2
_computing_data_reduction         Apex2
_computing_structure_solution     'SHELXS-97 (Sheldrick, 1990)'
_computing_structure_refinement   'SHELXL-97 (Sheldrick, 1997)'
_computing_molecular_graphics     'XSHEL (Bruker, 2004)'
_computing_publication_material   SHELXL-97

_refine_special_details
;
 Refinement of F^2^ against ALL reflections.  The weighted R-factor wR and
 goodness of fit S are based on F^2^, conventional R-factors R are based
 on F, with F set to zero for negative F^2^. The threshold expression of
 F^2^ > 2sigma(F^2^) is used only for calculating R-factors(gt) etc. and is
 not relevant to the choice of reflections for refinement.  R-factors based
 on F^2^ are statistically about twice as large as those based on F, and R-
 factors based on ALL data will be even larger.
;

_refine_ls_structure_factor_coef  Fsqd
_refine_ls_matrix_type            full
_refine_ls_weighting_scheme       calc
_refine_ls_weighting_details
'w=1/[\s^2^(Fo^2^)+(0.005P)^2^+0.9535P], P=(max(Fo^2^,0)+2Fc^2^)/3'
_atom_sites_solution_primary      direct
_atom_sites_solution_secondary    difmap
_atom_sites_solution_hydrogens    geom
_refine_ls_hydrogen_treatment     refU
_refine_ls_extinction_method      none
_refine_ls_extinction_coef        ?
_refine_ls_number_reflns          2268
_refine_ls_number_parameters      161
_refine_ls_number_restraints      0
_refine_ls_R_factor_all           0.0579
_refine_ls_R_factor_gt            0.0488
_refine_ls_wR_factor_ref          0.0970
_refine_ls_wR_factor_gt           0.0938
_refine_ls_goodness_of_fit_ref    1.000
_refine_ls_restrained_S_all       1.000
_refine_ls_shift/su_max           0.000
_refine_ls_shift/su_mean          0.000

loop_
 _atom_site_label
 _atom_site_type_symbol
 _atom_site_fract_x
 _atom_site_fract_y
 _atom_site_fract_z
 _atom_site_U_iso_or_equiv
 _atom_site_adp_type
 _atom_site_occupancy
 _atom_site_symmetry_multiplicity
 _atom_site_calc_flag
 _atom_site_refinement_flags
 _atom_site_disorder_assembly
 _atom_site_disorder_group
O1 O 0.6610(2) 0.38706(11) 0.89383(14) 0.0741(5) Uani 1 1 d . . .
N1 N 0.5555(2) 0.35818(10) 0.78880(14) 0.0468(4) Uani 1 1 d . . .
C2 C 0.3837(2) 0.40869(12) 0.72710(19) 0.0484(5) Uani 1 1 d . . .
C2A C 0.4312(3) 0.49318(14) 0.6750(2) 0.0685(7) Uani 1 1 d . . .
H2A1 H 0.5193 0.5250 0.7425 0.075(6) Uiso 0.93(3) 1 calc PR . .
H2A2 H 0.3213 0.5274 0.6399 0.075(6) Uiso 0.93(3) 1 calc PR . .
H2A3 H 0.4832 0.4807 0.6097 0.075(6) Uiso 0.93(3) 1 calc PR . .
H2A4 H 0.3633 0.4970 0.5856 0.075(6) Uiso 0.07(3) 1 calc PR . .
H2A5 H 0.5612 0.4946 0.6882 0.075(6) Uiso 0.07(3) 1 calc PR . .
H2A6 H 0.3993 0.5413 0.7184 0.075(6) Uiso 0.07(3) 1 calc PR . .
C2B C 0.2963(3) 0.42736(15) 0.8258(2) 0.0652(6) Uani 1 1 d . . .
H2B1 H 0.2718 0.3736 0.8610 0.060(5) Uiso 0.86(2) 1 calc PR . .
H2B2 H 0.1826 0.4582 0.7874 0.060(5) Uiso 0.86(2) 1 calc PR . .
H2B3 H 0.3785 0.4622 0.8923 0.060(5) Uiso 0.86(2) 1 calc PR . .
H2B4 H 0.2834 0.4891 0.8328 0.060(5) Uiso 0.14(2) 1 calc PR . .
H2B5 H 0.3727 0.4045 0.9064 0.060(5) Uiso 0.14(2) 1 calc PR . .
H2B6 H 0.1767 0.4005 0.8015 0.060(5) Uiso 0.14(2) 1 calc PR . .
C3 C 0.2518(2) 0.35544(12) 0.61889(18) 0.0475(5) Uani 1 1 d . . .
H3A H 0.1901 0.3127 0.6545 0.058(4) Uiso 1 1 calc R . .
H3B H 0.1581 0.3937 0.5643 0.058(4) Uiso 1 1 calc R . .
C4 C 0.3469(2) 0.31039(12) 0.54149(18) 0.0441(4) Uani 1 1 d . . .
C5 C 0.4927(3) 0.25126(12) 0.61718(18) 0.0488(5) Uani 1 1 d . . .
H5A H 0.5474 0.2220 0.5615 0.055(4) Uiso 1 1 calc R . .
H5B H 0.4387 0.2073 0.6564 0.055(4) Uiso 1 1 calc R . .
C6 C 0.6412(2) 0.29927(13) 0.71939(18) 0.0486(5) Uani 1 1 d . . .
C6A C 0.7623(3) 0.35100(16) 0.6627(2) 0.0672(6) Uani 1 1 d . . .
H6A1 H 0.6862 0.3869 0.5949 0.074(4) Uiso 1 1 calc R . .
H6A2 H 0.8327 0.3118 0.6299 0.074(4) Uiso 1 1 calc R . .
H6A3 H 0.8448 0.3870 0.7273 0.074(4) Uiso 1 1 calc R . .
C6B C 0.7577(3) 0.23421(15) 0.8149(2) 0.0681(6) Uani 1 1 d . . .
H6B1 H 0.8581 0.2639 0.8767 0.090(5) Uiso 1 1 calc R . .
H6B2 H 0.8059 0.1916 0.7715 0.090(5) Uiso 1 1 calc R . .
H6B3 H 0.6830 0.2060 0.8572 0.090(5) Uiso 1 1 calc R . .
C7 C 0.3122(3) 0.32013(12) 0.41688(18) 0.0479(5) Uani 1 1 d . . .
H7 H 0.3822 0.2861 0.3811 0.068(7) Uiso 1 1 calc R . .
C8 C 0.1776(2) 0.37773(12) 0.33009(17) 0.0434(4) Uani 1 1 d . . .
O8 O 0.0882(2) 0.43324(10) 0.35579(13) 0.0633(4) Uani 1 1 d . . .
O9 O 0.1677(2) 0.35998(9) 0.21150(13) 0.0609(4) Uani 1 1 d . . .
C9 C 0.0499(3) 0.41343(16) 0.11337(19) 0.0699(7) Uani 1 1 d . . .
H9A H -0.0752 0.4074 0.1117 0.076(6) Uiso 0.75(3) 1 calc PR . .
H9B H 0.0580 0.3959 0.0327 0.076(6) Uiso 0.75(3) 1 calc PR . .
H9C H 0.0875 0.4730 0.1295 0.076(6) Uiso 0.75(3) 1 calc PR . .
H9D H 0.1221 0.4435 0.0709 0.076(6) Uiso 0.25(3) 1 calc PR . .
H9E H -0.0111 0.4550 0.1499 0.076(6) Uiso 0.25(3) 1 calc PR . .
H9F H -0.0407 0.3778 0.0531 0.076(6) Uiso 0.25(3) 1 calc PR . .

loop_
 _atom_site_aniso_label
 _atom_site_aniso_U_11
 _atom_site_aniso_U_22
 _atom_site_aniso_U_33
 _atom_site_aniso_U_23
 _atom_site_aniso_U_13
 _atom_site_aniso_U_12
O1 0.0580(9) 0.0932(12) 0.0558(9) -0.0184(9) -0.0012(7) 0.0092(9)
N1 0.0388(8) 0.0507(9) 0.0459(9) -0.0006(7) 0.0076(7) 0.0034(7)
C2 0.0427(10) 0.0430(10) 0.0575(12) 0.0043(9) 0.0143(9) 0.0073(8)
C2A 0.0667(15) 0.0466(12) 0.0866(17) 0.0065(12) 0.0182(13) -0.0006(11)
C2B 0.0612(13) 0.0678(15) 0.0663(14) -0.0059(12) 0.0208(11) 0.0159(11)
C3 0.0350(9) 0.0480(11) 0.0561(12) 0.0046(9) 0.0107(8) 0.0020(8)
C4 0.0376(9) 0.0401(10) 0.0542(11) -0.0031(8) 0.0147(8) -0.0059(8)
C5 0.0474(10) 0.0449(10) 0.0554(12) 0.0016(9) 0.0190(9) 0.0029(9)
C6 0.0403(10) 0.0531(11) 0.0536(11) 0.0006(9) 0.0173(9) 0.0029(9)
C6A 0.0503(12) 0.0763(16) 0.0804(16) -0.0046(13) 0.0289(12) -0.0097(11)
C6B 0.0547(13) 0.0720(15) 0.0718(15) 0.0056(12) 0.0134(11) 0.0210(11)
C7 0.0431(10) 0.0450(10) 0.0543(12) -0.0028(9) 0.0145(9) 0.0021(8)
C8 0.0386(10) 0.0420(10) 0.0463(11) -0.0038(8) 0.0097(8) -0.0028(8)
O8 0.0658(9) 0.0604(9) 0.0605(9) 0.0002(7) 0.0168(7) 0.0180(8)
O9 0.0636(9) 0.0651(9) 0.0474(8) -0.0012(7) 0.0097(7) 0.0130(7)
C9 0.0735(15) 0.0787(16) 0.0447(12) 0.0041(11) 0.0029(11) 0.0196(13)

_geom_special_details
;
 All esds (except the esd in the dihedral angle between two l.s. planes)
 are estimated using the full covariance matrix.  The cell esds are taken
 into account individually in the estimation of esds in distances, angles
 and torsion angles; correlations between esds in cell parameters are only
 used when they are defined by crystal symmetry.  An approximate (isotropic)
 treatment of cell esds is used for estimating esds involving l.s. planes.
;

loop_
 _geom_bond_atom_site_label_1
 _geom_bond_atom_site_label_2
 _geom_bond_distance
 _geom_bond_site_symmetry_2
 _geom_bond_publ_flag
O1 N1 1.2736(19) . ?
N1 C6 1.497(2) . ?
N1 C2 1.502(2) . ?
C2 C2B 1.512(3) . ?
C2 C2A 1.533(3) . ?
C2 C3 1.543(3) . ?
C2A H2A1 0.9700 . ?
C2A H2A2 0.9700 . ?
C2A H2A3 0.9700 . ?
C2A H2A4 0.9700 . ?
C2A H2A5 0.9700 . ?
C2A H2A6 0.9700 . ?
C2B H2B1 0.9700 . ?
C2B H2B2 0.9700 . ?
C2B H2B3 0.9700 . ?
C2B H2B4 0.9700 . ?
C2B H2B5 0.9700 . ?
C2B H2B6 0.9700 . ?
C3 C4 1.492(3) . ?
C3 H3A 0.9800 . ?
C3 H3B 0.9800 . ?
C4 C7 1.346(3) . ?
C4 C5 1.485(3) . ?
C5 C6 1.523(3) . ?
C5 H5A 0.9800 . ?
C5 H5B 0.9800 . ?
C6 C6A 1.530(3) . ?
C6 C6B 1.532(3) . ?
C6A H6A1 0.9700 . ?
C6A H6A2 0.9700 . ?
C6A H6A3 0.9700 . ?
C6B H6B1 0.9700 . ?
C6B H6B2 0.9700 . ?
C6B H6B3 0.9700 . ?
C7 C8 1.471(3) . ?
C7 H7 0.9400 . ?
C8 O8 1.202(2) . ?
C8 O9 1.341(2) . ?
O9 C9 1.439(2) . ?
C9 H9A 0.9700 . ?
C9 H9B 0.9700 . ?
C9 H9C 0.9700 . ?
C9 H9D 0.9700 . ?
C9 H9E 0.9700 . ?
C9 H9F 0.9700 . ?

loop_
 _geom_angle_atom_site_label_1
 _geom_angle_atom_site_label_2
 _geom_angle_atom_site_label_3
 _geom_angle
 _geom_angle_site_symmetry_1
 _geom_angle_site_symmetry_3
 _geom_angle_publ_flag
O1 N1 C6 116.12(14) . . ?
O1 N1 C2 116.14(15) . . ?
C6 N1 C2 124.00(15) . . ?
N1 C2 C2B 107.93(16) . . ?
N1 C2 C2A 109.53(16) . . ?
C2B C2 C2A 110.00(18) . . ?
N1 C2 C3 109.67(15) . . ?
C2B C2 C3 109.91(17) . . ?
C2A C2 C3 109.78(17) . . ?
C2 C2A H2A1 109.5 . . ?
C2 C2A H2A2 109.5 . . ?
H2A1 C2A H2A2 109.5 . . ?
C2 C2A H2A3 109.5 . . ?
H2A1 C2A H2A3 109.5 . . ?
H2A2 C2A H2A3 109.5 . . ?
C2 C2A H2A4 109.5 . . ?
H2A1 C2A H2A4 141.1 . . ?
H2A2 C2A H2A4 56.3 . . ?
H2A3 C2A H2A4 56.3 . . ?
C2 C2A H2A5 109.5 . . ?
H2A1 C2A H2A5 56.3 . . ?
H2A2 C2A H2A5 141.1 . . ?
H2A3 C2A H2A5 56.3 . . ?
H2A4 C2A H2A5 109.5 . . ?
C2 C2A H2A6 109.5 . . ?
H2A1 C2A H2A6 56.3 . . ?
H2A2 C2A H2A6 56.3 . . ?
H2A3 C2A H2A6 141.1 . . ?
H2A4 C2A H2A6 109.5 . . ?
H2A5 C2A H2A6 109.5 . . ?
C2 C2B H2B1 109.5 . . ?
C2 C2B H2B2 109.5 . . ?
H2B1 C2B H2B2 109.5 . . ?
C2 C2B H2B3 109.5 . . ?
H2B1 C2B H2B3 109.5 . . ?
H2B2 C2B H2B3 109.5 . . ?
C2 C2B H2B4 109.5 . . ?
H2B1 C2B H2B4 141.1 . . ?
H2B2 C2B H2B4 56.3 . . ?
H2B3 C2B H2B4 56.3 . . ?
C2 C2B H2B5 109.5 . . ?
H2B1 C2B H2B5 56.3 . . ?
H2B2 C2B H2B5 141.1 . . ?
H2B3 C2B H2B5 56.3 . . ?
H2B4 C2B H2B5 109.5 . . ?
C2 C2B H2B6 109.5 . . ?
H2B1 C2B H2B6 56.3 . . ?
H2B2 C2B H2B6 56.3 . . ?
H2B3 C2B H2B6 141.1 . . ?
H2B4 C2B H2B6 109.5 . . ?
H2B5 C2B H2B6 109.5 . . ?
C4 C3 C2 112.66(15) . . ?
C4 C3 H3A 109.1 . . ?
C2 C3 H3A 109.1 . . ?
C4 C3 H3B 109.1 . . ?
C2 C3 H3B 109.1 . . ?
H3A C3 H3B 107.8 . . ?
C7 C4 C5 121.04(17) . . ?
C7 C4 C3 126.24(17) . . ?
C5 C4 C3 112.72(16) . . ?
C4 C5 C6 111.66(16) . . ?
C4 C5 H5A 109.3 . . ?
C6 C5 H5A 109.3 . . ?
C4 C5 H5B 109.3 . . ?
C6 C5 H5B 109.3 . . ?
H5A C5 H5B 107.9 . . ?
N1 C6 C5 109.74(14) . . ?
N1 C6 C6A 109.87(16) . . ?
C5 C6 C6A 110.93(17) . . ?
N1 C6 C6B 107.34(16) . . ?
C5 C6 C6B 109.08(17) . . ?
C6A C6 C6B 109.81(17) . . ?
C6 C6A H6A1 109.5 . . ?
C6 C6A H6A2 109.5 . . ?
H6A1 C6A H6A2 109.5 . . ?
C6 C6A H6A3 109.5 . . ?
H6A1 C6A H6A3 109.5 . . ?
H6A2 C6A H6A3 109.5 . . ?
C6 C6B H6B1 109.5 . . ?
C6 C6B H6B2 109.5 . . ?
H6B1 C6B H6B2 109.5 . . ?
C6 C6B H6B3 109.5 . . ?
H6B1 C6B H6B3 109.5 . . ?
H6B2 C6B H6B3 109.5 . . ?
C4 C7 C8 127.63(18) . . ?
C4 C7 H7 116.2 . . ?
C8 C7 H7 116.2 . . ?
O8 C8 O9 122.87(17) . . ?
O8 C8 C7 128.00(18) . . ?
O9 C8 C7 109.12(16) . . ?
C8 O9 C9 117.14(16) . . ?
O9 C9 H9A 109.5 . . ?
O9 C9 H9B 109.5 . . ?
H9A C9 H9B 109.5 . . ?
O9 C9 H9C 109.5 . . ?
H9A C9 H9C 109.5 . . ?
H9B C9 H9C 109.5 . . ?
O9 C9 H9D 109.5 . . ?
H9A C9 H9D 141.1 . . ?
H9B C9 H9D 56.3 . . ?
H9C C9 H9D 56.3 . . ?
O9 C9 H9E 109.5 . . ?
H9A C9 H9E 56.3 . . ?
H9B C9 H9E 141.1 . . ?
H9C C9 H9E 56.3 . . ?
H9D C9 H9E 109.5 . . ?
O9 C9 H9F 109.5 . . ?
H9A C9 H9F 56.3 . . ?
H9B C9 H9F 56.3 . . ?
H9C C9 H9F 141.1 . . ?
H9D C9 H9F 109.5 . . ?
H9E C9 H9F 109.5 . . ?

loop_
 _geom_torsion_atom_site_label_1
 _geom_torsion_atom_site_label_2
 _geom_torsion_atom_site_label_3
 _geom_torsion_atom_site_label_4
 _geom_torsion
 _geom_torsion_site_symmetry_1
 _geom_torsion_site_symmetry_2
 _geom_torsion_site_symmetry_3
 _geom_torsion_site_symmetry_4
 _geom_torsion_publ_flag
O1 N1 C2 C2B -47.4(2) . . . . ?
C6 N1 C2 C2B 155.33(17) . . . . ?
O1 N1 C2 C2A 72.4(2) . . . . ?
C6 N1 C2 C2A -84.9(2) . . . . ?
O1 N1 C2 C3 -167.09(16) . . . . ?
C6 N1 C2 C3 35.6(2) . . . . ?
N1 C2 C3 C4 -42.5(2) . . . . ?
C2B C2 C3 C4 -160.97(17) . . . . ?
C2A C2 C3 C4 77.9(2) . . . . ?
C2 C3 C4 C7 -121.0(2) . . . . ?
C2 C3 C4 C5 58.3(2) . . . . ?
C7 C4 C5 C6 118.40(19) . . . . ?
C3 C4 C5 C6 -60.9(2) . . . . ?
O1 N1 C6 C5 164.37(17) . . . . ?
C2 N1 C6 C5 -38.3(2) . . . . ?
O1 N1 C6 C6A -73.4(2) . . . . ?
C2 N1 C6 C6A 83.9(2) . . . . ?
O1 N1 C6 C6B 45.9(2) . . . . ?
C2 N1 C6 C6B -156.75(17) . . . . ?
C4 C5 C6 N1 47.6(2) . . . . ?
C4 C5 C6 C6A -74.0(2) . . . . ?
C4 C5 C6 C6B 164.92(17) . . . . ?
C5 C4 C7 C8 -177.88(17) . . . . ?
C3 C4 C7 C8 1.4(3) . . . . ?
C4 C7 C8 O8 8.9(3) . . . . ?
C4 C7 C8 O9 -171.64(18) . . . . ?
O8 C8 O9 C9 2.9(3) . . . . ?
C7 C8 O9 C9 -176.56(17) . . . . ?

_diffrn_measured_fraction_theta_max    1.000
_diffrn_reflns_theta_full              25.00
_diffrn_measured_fraction_theta_full   1.000
_refine_diff_density_max    0.439
_refine_diff_density_min   -0.157
_refine_diff_density_rms    0.034
 
_diffrn_orient_matrix_type            standard
_diffrn_orient_matrix_UB_11           0.1280062
_diffrn_orient_matrix_UB_12          -0.0106648
_diffrn_orient_matrix_UB_13           0.0570333
_diffrn_orient_matrix_UB_21          -0.0466372
_diffrn_orient_matrix_UB_22          -0.0408026
_diffrn_orient_matrix_UB_23           0.0508362
_diffrn_orient_matrix_UB_31           0.0110672
_diffrn_orient_matrix_UB_32          -0.0486115
_diffrn_orient_matrix_UB_33          -0.0551647
_symmetry_space_group_name_Hall       '-P 2ybc'
_exptl_crystal_id
'UMBC/Kao piperidine-1-oxyl-4-methylene acetic acid methyl ester'
_diffrn_measurement_frame_width-CCD  -0.30
_diffrn_measurement_details           610,610,610
_diffrn_measurement_total_frames-CCD  1830
_diffrn_measurement_frame_time-CCD    45
_diffrn_measurement_total_time-CCD    25.9
_diffrn_source_voltage                50.00
_diffrn_source_current                30.00
_diffrn_detector_distance-CCD         5.800
_diffrn_measurement_frame_size-CCD    512
_diffrn_measurement_specimen_support  'glass capillary'
_diffrn_detector                      'CCD area detector'
_diffrn_detector_type                 'Bruker Smart Apex II'

#_______________________________________________________________________________
#
_publ_section_references
;
Bruker (2005). Apex2. Bruker AXS Inc., Madison, Wisconsin, USA.

Sheldrick, G. M. (1990). Acta Cryst. A46, 467-473.

Sheldrick, G. M. (1996). SADABS. University of G\"ottingen, Germany.

Sheldrick, G. M. (1997). SHELXL-97. University of G\"ottingen, Germany.

Spek, A. L. (1990). Acta Cryst., A46, C-34.
;
